# Supplementary material for: Comprehensive evaluation of typical planetary boundary layer (PBL) parameterization schemes in China – Part 1: Understanding expressiveness of schemes for different regions from the mechanism perspective
Source: Copernicus journal article supplement (doi:10.5194/gmd-16-6635-2023), 2023-11-16
Supplement: Supplementary file 1 [file gmd-16-6635-2023-supplement.zip]

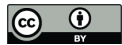

## *Supplement of*

# **Comprehensive evaluation of typical planetary boundary layer (PBL) parameterization schemes in China – Part 1: Understanding expressiveness of schemes for different regions from the mechanism perspective**

**Wenxing Jia et al.**

*Correspondence to:* Xiaoye Zhang (xiaoye@cma.gov.cn)

- gmd-16-6635-2023-supplement-title-page.pdf
- gmd-2023-30-supplement-version4
  - supplement-30-final
    - \* 1 manuscript-supplements-Rev.docx
    - \* 3.9.1\_namelist.input

The copyright of individual parts of the supplement might differ from the article licence.
